# Supplementary material for: Meat emulsion moisture content monitoring using SWIR hyperspectral imaging system
Source: Research Square preprint supplement (doi:10.21203/rs.3.rs-7722494/v1), 2025-10-12
Supplement: Supplementary file 1 [file a7d7a3ade68183b20d7a2994.docx]

**Table 1.** Meat emulsion experiment design using 3×7 factorial design

| Mixing  time | A group | B group | C group |
| --- | --- | --- | --- |
| 6:2  (meat : fat ratio) | 5:3  (meat : fat ratio) | 4:4  (meat : fat ratio) |
| 0 min | A0 | B0 | C0 |
| 1 min | A1 | B1 | C1 |
| 2 min | A2 | B2 | C2 |
| 5 min | A5 | B5 | C5 |
| 7 min | A7 | B7 | C7 |
| 10 min | A10 | B10 | C10 |
| 15 min | A15 | B15 | C15 |

**Table 2.** Meat better formula for different meat, fat ratio

| Meat better formula | | | | | | |
| --- | --- | --- | --- | --- | --- | --- |
| Fat/lean meat ratio |  | A group (2:6) |  | B group (3:5) |  | C group (4:4) |
| Pork lean meat (%) |  | 60 (1800 g) |  | 50 (1500 g) |  | 40 (1200 g) |
| Pork fat (%) |  | 20 (600 g) |  | 30 (900 g) |  | 40 (1200 g) |
| Ice water (%) |  | 20 (600 g) |  | 20 (600 g) |  | 20 (600 g) |
| Total (%) |  | 100 (3000 g) |  | 100 (3000 g) |  | 100 (3000 g) |
| Others (% of meat batter) |  |  |  |  |  |  |
| Refined salt |  | 1.40 |  | 1.40 |  | 1.40 |
| Sodium nitrite |  | 0.015 |  | 0.015 |  | 0.015 |
| Sodium tri polyphosphate |  | 0.30 |  | 0.30 |  | 0.30 |
| Mono sodium glutamate |  | 0.40 |  | 0.40 |  | 0.40 |
| Sugar |  | 0.60 |  | 0.60 |  | 0.60 |
| Ground black pepper |  | 0.15 |  | 0.15 |  | 0.15 |
| Ground coriander |  | 0.15 |  | 0.15 |  | 0.15 |
| Ground cardamom |  | 0.15 |  | 0.15 |  | 0.15 |
| Potato starch |  | 4.00 |  | 4.00 |  | 4.00 |
| Soy protein isolate |  | 1.00 |  | 1.00 |  | 1.00 |

**Table 3**. Meat emulsion moisture contents (%) analyzed by two-way ANOVA and Duncan’s multiple range test

| Parameter | MF | | |  | Mixing time (min) | | | | | | | SEM | *P* value | | |
| --- | --- | --- | --- | --- | --- | --- | --- | --- | --- | --- | --- | --- | --- | --- | --- |
| A | B | C | 0 | 1 | 2 | 5 | 7 | 10 | 15 | MF | Time | MF:  Time |
| Moisture (%) | 63.4x | 57.2y | 52.4z |  | 61.8a | 56.9bc | 58.6b | 56.4c | 57.3bc | 56.5c | 56.5c | 0.34 | <0.001 | <0.001 | 0.202 |

SEM: Standard error of mean; MF: lean meat and fat ratio; Time: mixing time; MF:Time :Meat and fat ratio with mixing time effect;

**Table 4**. Results of meat emulsion moisture content (%) prediction model using different preprocessing method with 100 Monte-Carlo method

| Parameter | Preprocessing | Calibration set | |  | Cross validation set | |  | Prediction set | |
| --- | --- | --- | --- | --- | --- | --- | --- | --- | --- |
| *R2C* | *RMSEC*  *(%)* |  | *R2CV* | *RMSECV (%)* |  | *R2P* | *RMSEP*  *(%)* |
| PLSR | Mean norm. | 0.84±0.07 | 2.05±0.51 |  | 0.73±0.08 | 2.68±0.43 |  | 0.67±0.19 | 2.88±0.76 |
| Max norm. | 0.85±0.07 | 1.98±0.50 |  | 0.73±0.08 | 2.68±0.42 |  | 0.68±0.19 | 2.86±0.74 |
| Range norm. | 0.84±0.07 | 2.05±0.53 |  | 0.73±0.07 | 2.67±0.37 |  | 0.68±0.15 | 2.89±0.65 |
| MSC | 0.83±0.06 | 2.09±0.47 |  | 0.75±0.06 | 2.60±0.35 |  | 0.70±0.16 | 2.78±0.70 |
| SNV | 0.84±0.06 | 2.05±0.51 |  | 0.74±0.07 | 2.62±0.38 |  | 0.66±0.29 | 2.92±0.98 |
| SG1 | 0.83±0.06 | 2.13±0.44 |  | 0.75±0.06 | 2.59±0.33 |  | 0.69±0.17 | 2.82±0.68 |
| SG2 | 0.83±0.08 | 2.07±0.54 |  | 0.73±0.07 | 2.69±0.41 |  | 0.65±0.21 | 3.01±0.82 |
| Raw | 0.84±0.07 | 2.06±0.51 |  | 0.74±0.07 | 2.65±0.38 |  | 0.69±0.17 | 2.84±0.68 |
| ElasticNet | Mean norm. | 0.83±0.05 | 2.14±0.37 |  | 0.74±0.07 | 2.66±0.38 |  | 0.71±0.15 | 2.77±0.63 |
| Max norm. | 0.85±0.06 | 1.99±0.43 |  | 0.74±0.07 | 2.63±0.39 |  | 0.73±0.11 | 2.68±0.55 |
| Range norm. | 0.84±0.06 | 2.04±0.46 |  | 0.74±0.07 | 2.66±0.38 |  | 0.71±0.13 | 2.75±0.59 |
| MSC | 0.83±0.05 | 2.09±0.39 |  | 0.76±0.06 | 2.56±0.34 |  | 0.72±0.15 | 2.68±0.69 |
| SNV | 0.83±0.05 | 2.11±0.35 |  | 0.76±0.06 | 2.57±0.33 |  | 0.72±0.17 | 2.68±0.73 |
| SG1 | 0.83±0.05 | 2.15±0.35 |  | 0.76±0.05 | 2.56±0.31 |  | 0.74±0.10 | 2.62±0.52 |
| SG2 | 0.83±0.07 | 2.10±0.49 |  | 0.74±0.07 | 2.64±0.37 |  | 0.69±0.17 | 2.83±0.73 |
| Raw | 0.82±0.04 | 2.19±0.26 |  | 0.75±0.05 | 2.61±0.30 |  | 0.76±0.06 | 2.54±0.39 |
| Random forest | Mean norm. | 0.87±0.02 | 1.84±0.18 |  | 0.72±0.05 | 2.75±0.28 |  | 0.72±0.07 | 2.73±0.38 |
| Max norm. | 0.87±0.02 | 1.88±0.18 |  | 0.69±0.06 | 2.90±0.29 |  | 0.70±0.08 | 2.82±0.39 |
| Range norm. | 0.87±0.03 | 1.89±0.17 |  | 0.68±0.05 | 2.95±0.28 |  | 0.69±0.09 | 2.89±0.43 |
| MSC | 0.87±0.02 | 1.90±0.19 |  | 0.67±0.07 | 3.00±0.36 |  | 0.69±0.08 | 2.89±0.44 |
| SNV | 0.87±0.02 | 1.90±0.19 |  | 0.66±0.07 | 3.01±0.35 |  | 0.69±0.08 | 2.91±0.45 |
| SG1 | 0.89±0.02 | 1.71±0.18 |  | 0.72±0.06 | 2.74±0.32 |  | 0.74±0.07 | 2.66±0.40 |
| SG2 | 0.89±0.02 | 1.69±0.17 |  | 0.73±0.05 | 2.72±0.30 |  | 0.74±0.07 | 2.66±0.41 |
| Raw | 0.81±0.03 | 2.25±0.19 |  | 0.61±0.06 | 3.27±0.27 |  | 0.62±0.11 | 3.18±0.44 |
| Ensemble model | Mean norm. | 0.87±0.04 | 1.89±0.35 |  | 0.76±0.06 | 2.51±0.36 |  | 0.73±0.10 | 2.65±0.52 |
| Max norm. | 0.87±0.05 | 1.84±0.37 |  | 0.75±0.07 | 2.57±0.39 |  | 0.73±0.11 | 2.67±0.52 |
| Range norm. | 0.86±0.05 | 1.89±0.39 |  | 0.75±0.06 | 2.58±0.35 |  | 0.72±0.10 | 2.73±0.51 |
| MSC | 0.85±0.05 | 1.97±0.37 |  | 0.75±0.06 | 2.58±0.36 |  | 0.73±0.12 | 2.69±0.58 |
| SNV | 0.86±0.05 | 1.96±0.36 |  | 0.75±0.06 | 2.58±0.37 |  | 0.72±0.12 | 2.71±0.59 |
| SG1 | 0.86±0.04 | 1.93±0.33 |  | 0.76±0.05 | 2.54±0.33 |  | 0.74±0.09 | 2.63±0.48 |
| SG2 | 0.87±0.05 | 1.86±0.39 |  | 0.76±0.06 | 2.56±0.37 |  | 0.72±0.12 | 2.74±0.59 |
| Raw | 0.85±0.04 | 2.00±0.33 |  | 0.76±0.06 | 2.55±0.34 |  | 0.75±0.07 | 2.61±0.42 |

R2c: R2 of calibration set; R2v: R2 of cross validation set; R2p: R2 of prediction set; RMSEC: root mean square error of calibration set; RMSEV: root mean square error of cross validation set; RMSEP: root mean square error of prediction set; norm: normalization; MSC: multiplicative scatter correction; SNV: standard normal variate; SG1: Savitzky-Golay derivate 1st order; SG2: Savitzky-Golay derivate 2nd order; Raw: raw spectrum
